# Supplementary material
Source: PubMed Central journal article supplement (PMC2797148)
Supplement: supp_M109.048983_jbc.M109.048983-1.pdf [file supp_M109.048983_jbc.M109.048983-1.pdf]

Figure S1, Taurin *et al*

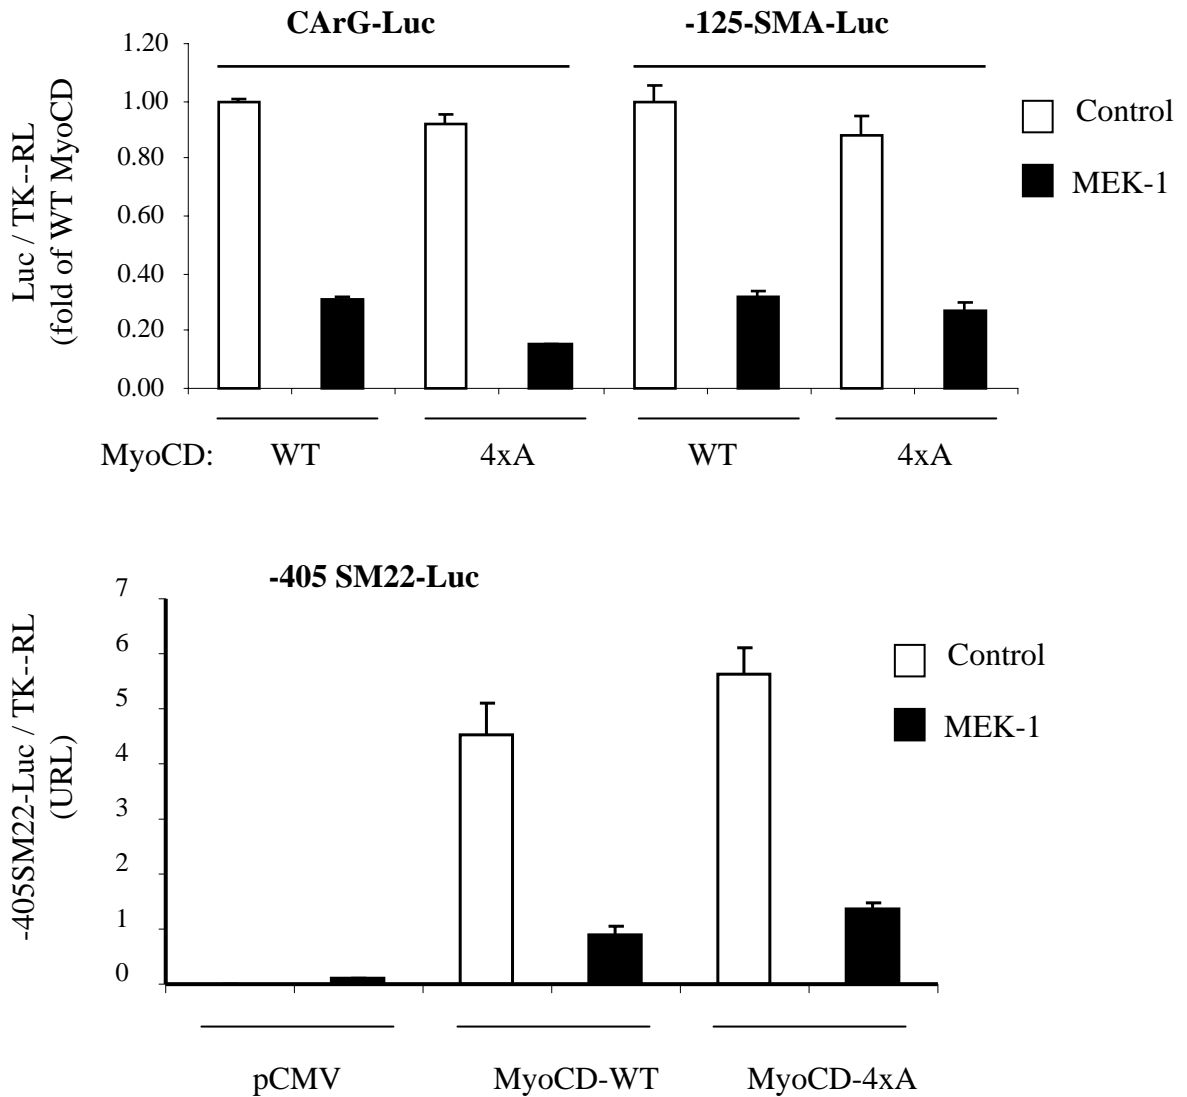

**Figure S1. Regulation by MAP kinase of SRF and SM promoter activity induced by myocardin (MyoCD) expression.**

10T1/2 cells were transfected with firefly luciferase reporters for SRF (CARG-Luc), or for SM- $\alpha$ -actin or SM22 promoters, control TK-Renilla plasmid, along with cDNA for WT-MyoCD or with phosphorylation-deficient 4xA mutant, and MEK-1 or control plasmid as indicated. Twenty four hours post transfection, firefly luciferase activity was measured and normalized to Renilla activity.
